# Supplementary material
Source: PubMed Central journal article supplement (PMC2662229)

### **Supplementary material:**

*Supplementary table 1.* Gene expression analysis of Chem-LTD and Chem-LTP-stimulated hippocampal slices. The table shows the fold changes for significant differently expressed genes after 1h of NMDA or forskolin (rolipram/magnesium free) stimulation compared to non-stimulated slices. The columns shows the fold changes for significant differently expressed genes retrieved in microarray analysis and for genes tested in qRT-PCR assays. Mean fold changes were calculated by different software packages. n.s., non-significant (not compliant with the filters imposed to the data, -see Materials and Methods) \*,  $p < 0.05$  in Welch's t-test. Negative genes in microarray analysis tested by qRT-PCR assays: Egr1, Fos (NMDA stimulation) , Crem (Chem-LTP stimulation). The columns shows the software used in the analyses (see Materials and Methods) and the resulting fold change. n.d., not determined in the corresponding analysis

*Supplementary table 2.* Antibodies used in western blotting (WB) assays. Column A shows the antibody target, column B: antibody working dilution, column C: Catalogue number and D: company

*Supplementary table 3.* List of primers used in the qRT-PCR assays. Left primer, sense; right primer, antisense.

#### *Supplementary figure 1*

Kinase inhibitors were tested against a range of different substrates (see materials)  
A. UO126 prevented the phosphorylation of Erk2pT185/pY187. SB235080, decreased the phosphorylation of ATF2 S71, KN-62 reduced the phosphorylation of GluR1 S831. PI3K inhibitor, Wortmannin decreased the phosphorylation of Akt T308 and S473. \*, significant changes ( $P < 0.001$ , Student's t test)

#### *Supplementary figure 2.*

Promoter architecture of genes induced by LTD and LTP protocols. 5'-flanking region (1 kb upstream and 200 bp downstream of the transcription start site) of *arc*, *egr2*, *egr4* and *npas4* were obtained from Ensembl build 37 and analyzed using the public version of Match 1.0 ([www.gene-regulation.com](http://www.gene-regulation.com)).

# Supplementary Fig.1

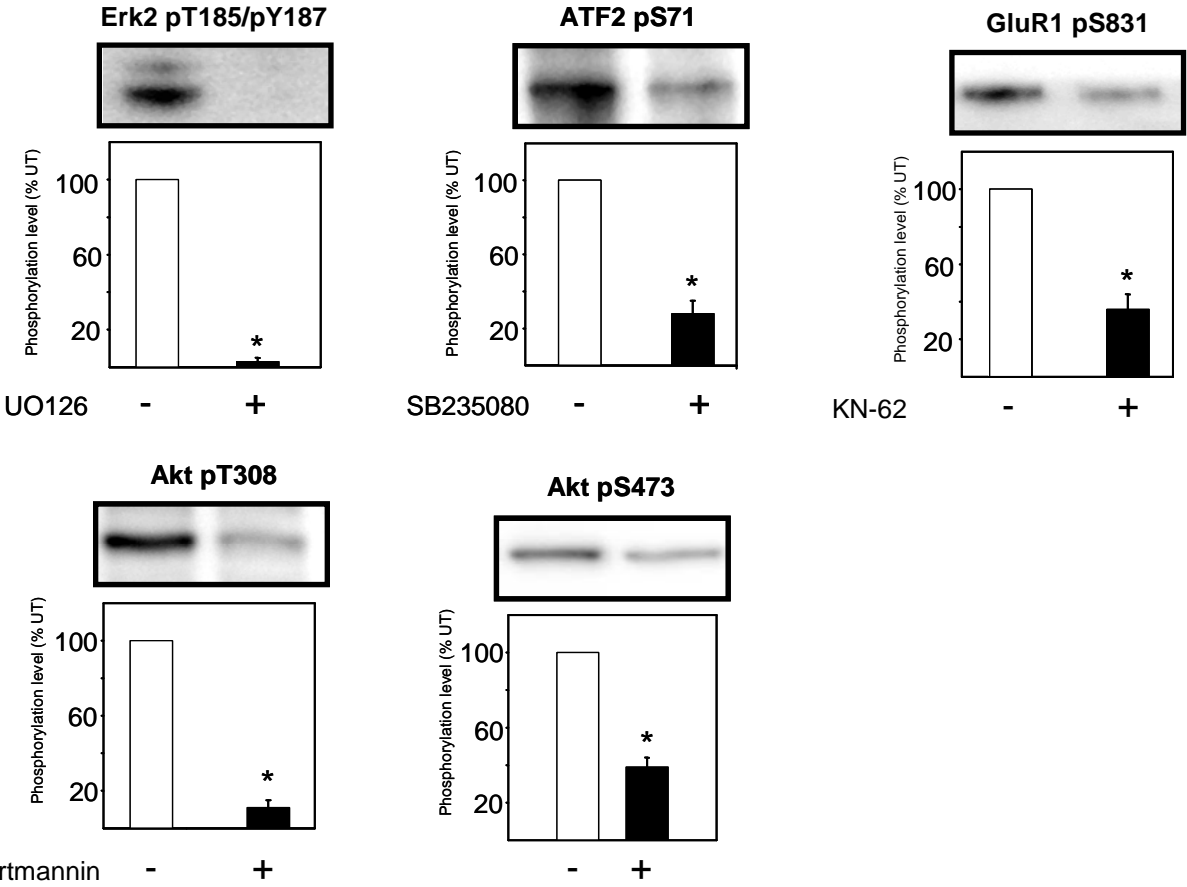

**B**

Wortmannin

Supplementary Fig. 2

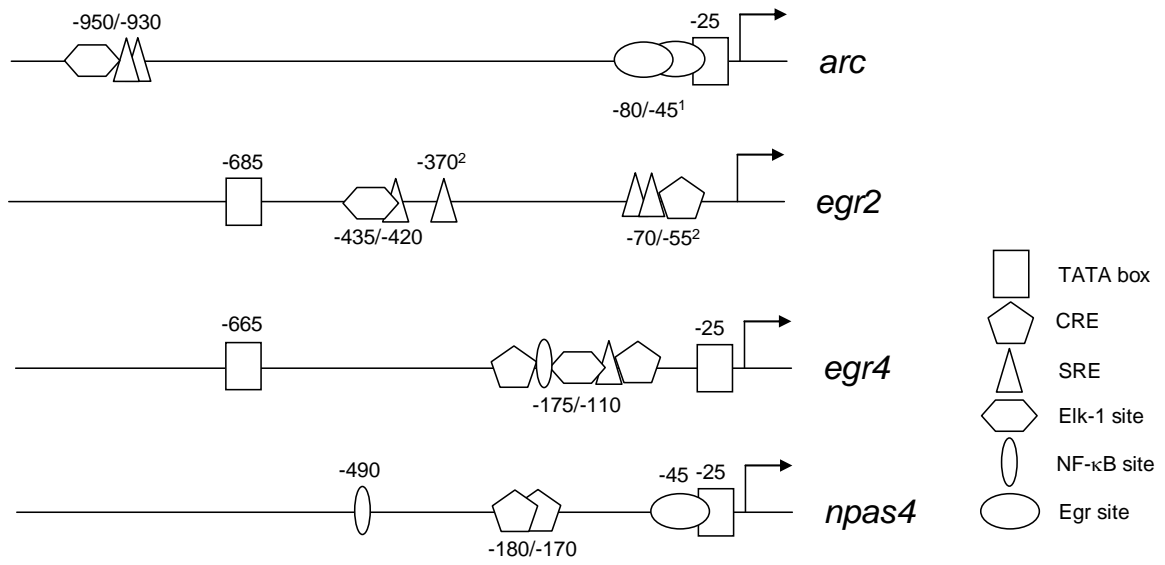

Supplement: M804951200_1.pdf [file M804951200_1.pdf]
